# Supplementary material for: Trihalomethane, haloacetic acid, and haloacetonitrile behaviors in water heater storage tanks
Source: Royal Society of Chemistry journal article supplement (doi:10.1039/d3ew00375b), 2023-01-01
Supplement: d3ew00375b1.pdf [file d3ew00375b1.pdf]

## Supporting Information

### Trihalomethane, haloacetic acid, haloacetonitrile behavior in electric storage water heaters

Duarte Batista, M. (University of Colorado Boulder); Summers, R.S. (University of Colorado Boulder); Bartrand, T.A. (ESPRI); Yu, Y. (CU/BC); Tolofari, D. (Drexel University; Seidel, C. (Corona Environmental Consulting); Masters, S.V. (University of Colorado Boulder)\*

### Tracer studies

A tracer solution consisting of a mix of building feed water, previously flushed for 15 minutes and at around 22 °C, and spiked sodium chloride was continuously pumped into the 50-gallon electric water heater for five theoretical tank residence times. The conductivity of the tracer solution was approximately 1.7 mS/cm. Three flow rates (1.5, 2.0 and 2.5 gpm) and two temperature settings (45 °C and 60 °C) were tested. Flow, temperature, and conductivity data were monitored every 2 seconds. Normalized operation time, or throughput,  $\theta$ , is

$$\theta = t/\tau \quad [S.1]$$

where  $t$  is time from the start of tracer injection in minutes,

Normalized conductivity during the fill portion of the experiment was calculated as:

$$C^* = \frac{C - C_0}{C_S - C_0} \quad [S.2]$$

where  $C$  is conductivity,  $C_0$  is conductivity in the water heater at the initiation of the tracer study,  $C_S$  is the conductivity of the tracer solution in the water heater influent water and  $C$  is the conductivity in the water heater effluent with time.

At time zero of the tracer experiment, water temperature within the tank was about 44.5 °C and normalized conductivity was close to zero. As cold water with sodium chloride (initial temperature of 22 °C and conductivity of 1.7 mS/cm) was pumped into the tank, conductivity and temperature gradually changed, and after two theoretical residence times conductivity was equal to the influent value and temperature of the tank effluent dropped to about 37 °C. Temperatures within the tank were not measured. As cold water with tracer is introduced near the bottom of the

tank, it likely displaces hot tank water upwards and the tank behaves as a PFR. After 20 minutes of tank use, which corresponds to the simulated low use pattern in this study, approximately 60% of the tank volume had been displaced with fresh feed water, and the remaining 40% corresponds to hot tank water. As the tank behaved as a PFR at that point in time, it is expected that water quality in tank effluent samples would significantly differ from the feed water quality. After about one tank residence time, temperature difference between feed and tank water decreased, thus allowing mixing to occur, and possibly short-circuiting. At 40 minutes of tank use, which is the duration chosen for the simulated high use pattern in this study, the tank volume had been completely displaced, the temperature difference between influent water and water remaining in the tank decreased and the tank hydraulics approached a mixed reactor, thus causing tank water quality to be similar to the feed water quality (Figure 1). That is, after long periods of use, water in the tank effluent was a mixture of feed water and tank water. For the tanks under high use, the difference in water quality between an early use in the morning and a later use in the afternoon was also assessed. At the beginning of the first use, the hot water within the tank was partially displaced, whereas at the end of the third use, the tank had already been displaced three times throughout the day. Tank hydraulics are likely complex and require additional experimentation or computational fluid dynamic model to understand.

Samples were collected at three locations along the hot water system (Figure 1). The influent sample, or the cold-water supply of the tank, was taken from the feed sample port after the influent line had been flushed for 30 minutes. Flushing the feed line prior to use was intended to reduce the impact of water quality changes between the building entry point and the water heater supply installation on water heater operation and processes. Tank effluent samples were taken towards the end of the daily tank flushing cycle to evaluate initial water quality that remained stagnant in the tank before the actual use. Finally, POU samples were taken directly from the sample port before the showerhead. Samples were collected shortly after the beginning of a use period after water temperature had increased in the pipe connected to the POU sample port. POU samples helped to evaluate water quality consumers would likely be exposed to when using hot water for multiple uses in a house such as taking a shower, handwashing, etc.

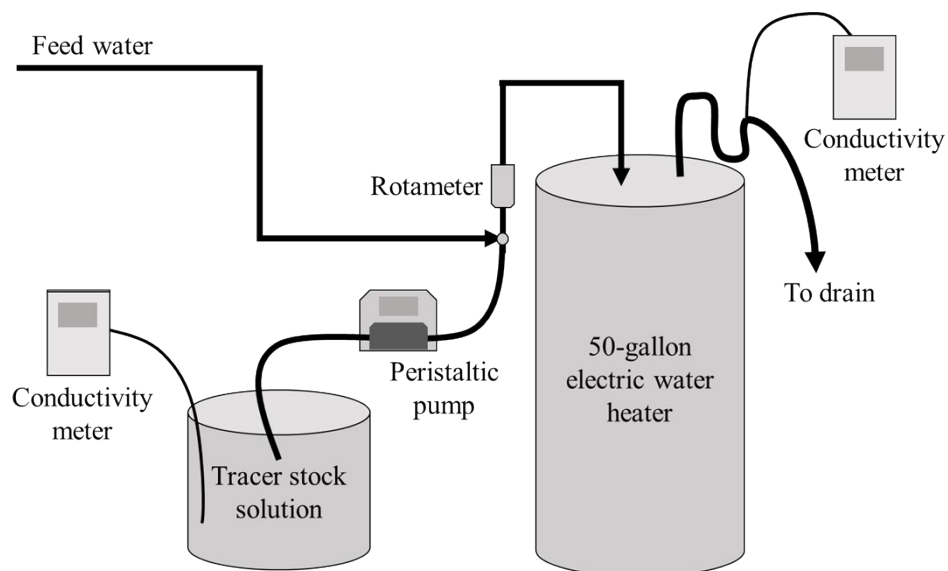

Figure S1. Schematic of the tracer study experimental setup.

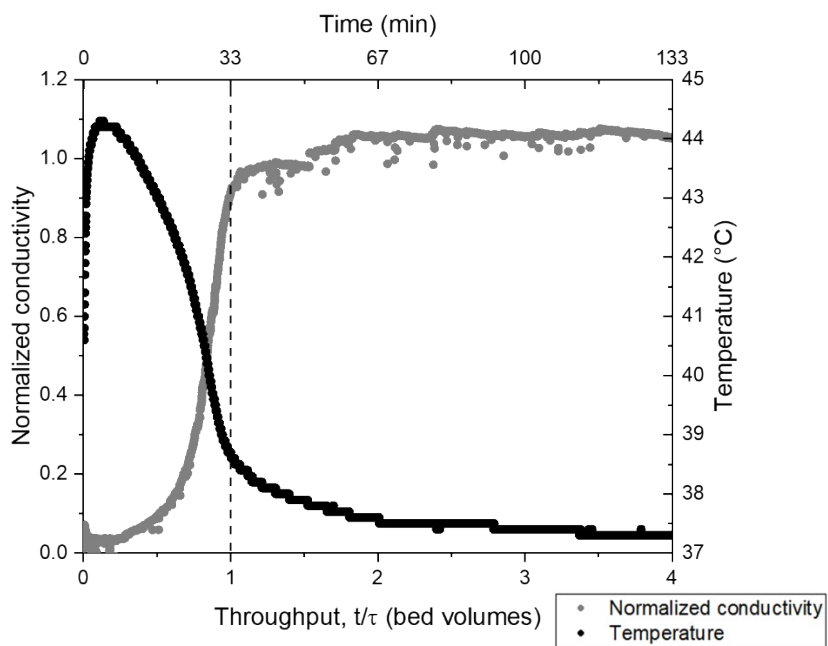

Figure S2. Normalized conductivity and temperature as a function of throughput in bed volumes.

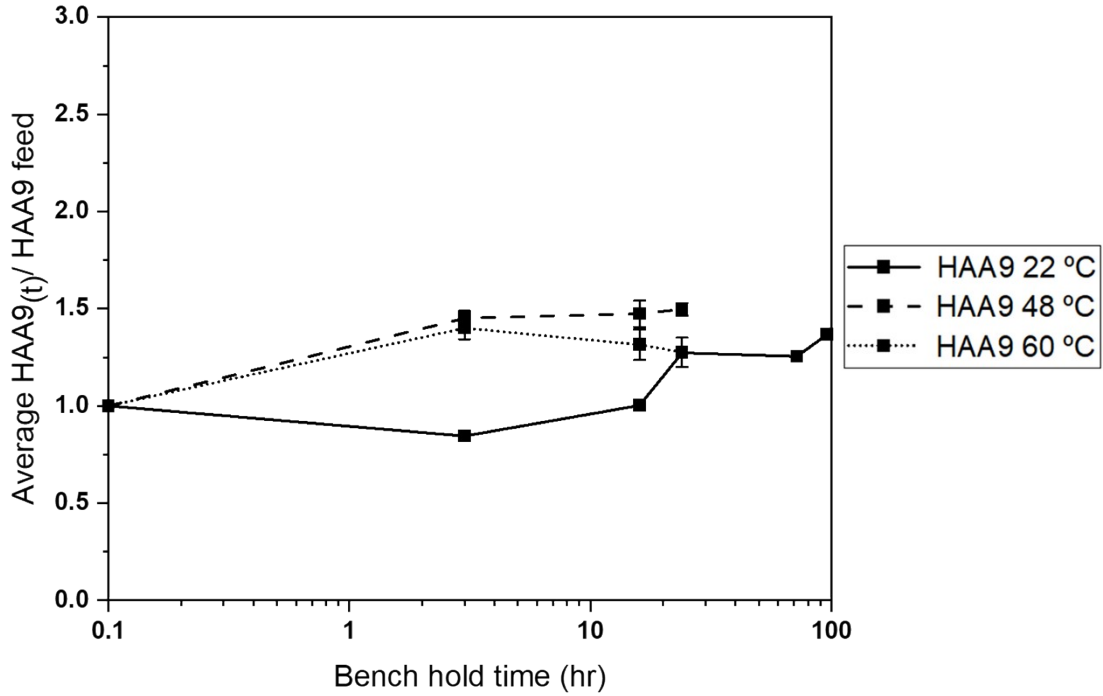

Figure S3. HAA9 kinetic behavior normalized to the initial HAA9 concentration (n = 36) as a function of bench hold time at free chlorine study site. Estimated travel time within the water distribution system is 24 hours to the lab feed. Average initial DBP concentration was: HAA9 =  $28.8 \pm 5.1 \mu\text{g/L}$ .

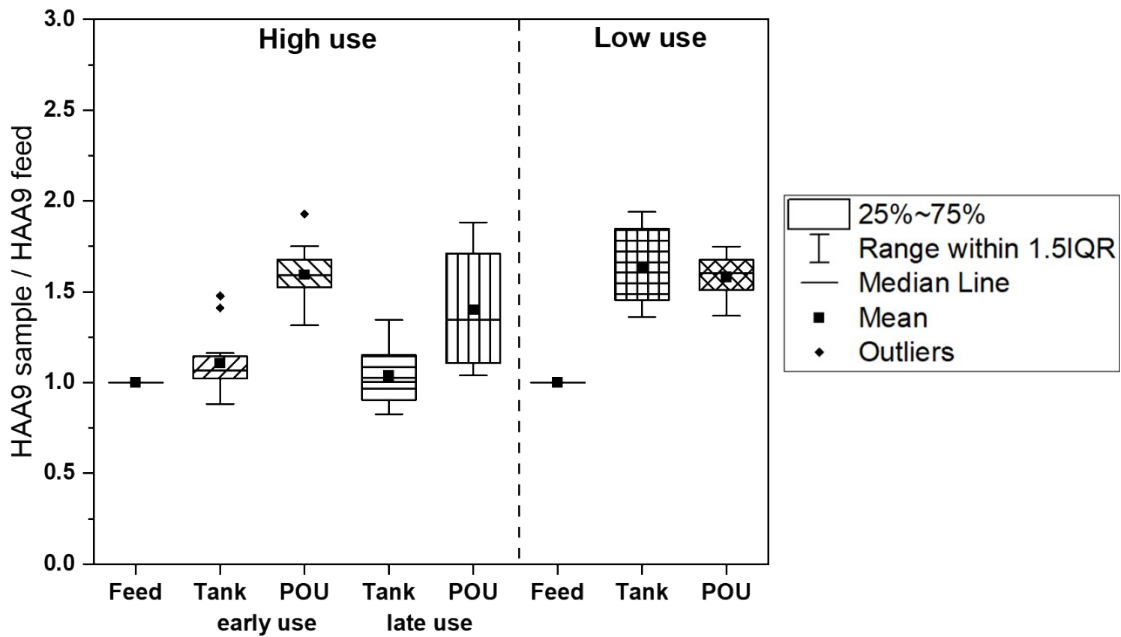

Figure S4. Average normalized HAA9 for all sample locations under the different use patterns in Phase 1 (48 °C) in free chlorine system Boulder, CO (n = 83). Average feed concentration was  $25.3 \pm 9.8 \mu\text{g/L}$ .

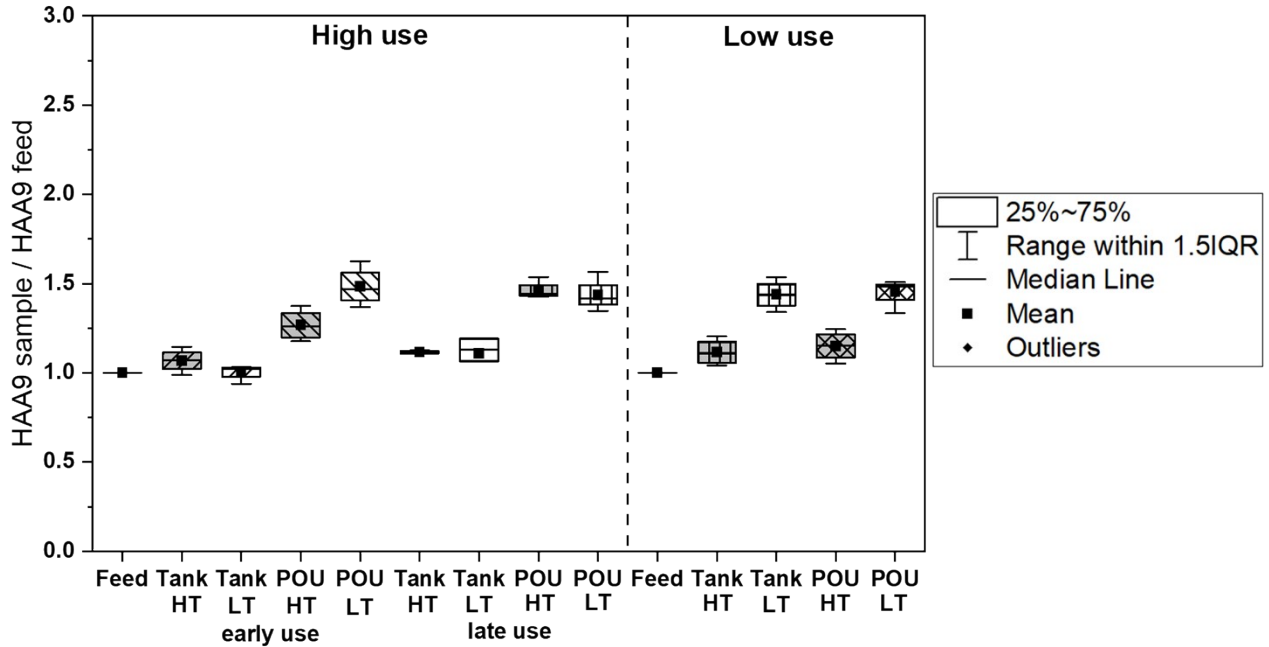

Figure S5. Average normalized HAA9 concentrations for all sample locations under the different use patterns in Phase 2 in free chlorine system Boulder, CO (n = 55). Average feed concentration was  $23.1 \pm 2.9 \mu\text{g/L}$ . HT = high temperature of  $60^\circ\text{C}$ ; LT = low temperature of  $45^\circ\text{C}$

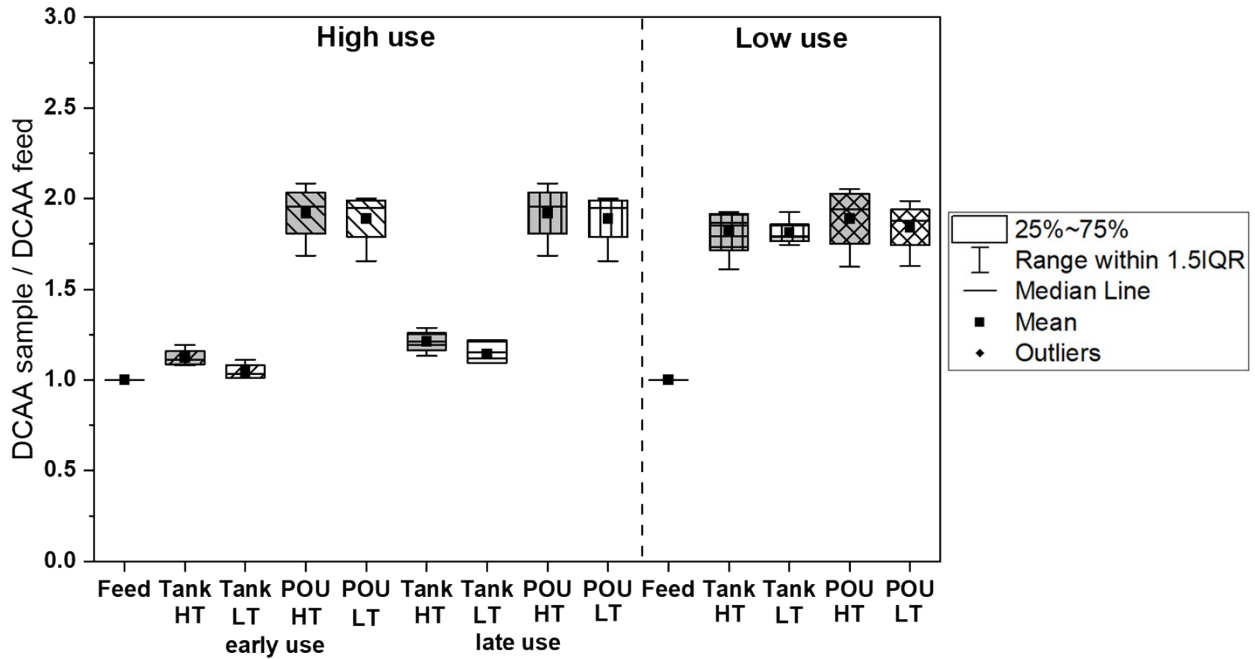

Figure S6. Average normalized DCAA concentrations for all sample locations under the different use patterns in Phase 2 in free chlorine system Boulder, CO (n = 55). Average feed concentration was  $10.5 \pm 1.1 \mu\text{g/L}$ . HT = high temperature of  $60^\circ\text{C}$ ; LT = low temperature of  $45^\circ\text{C}$

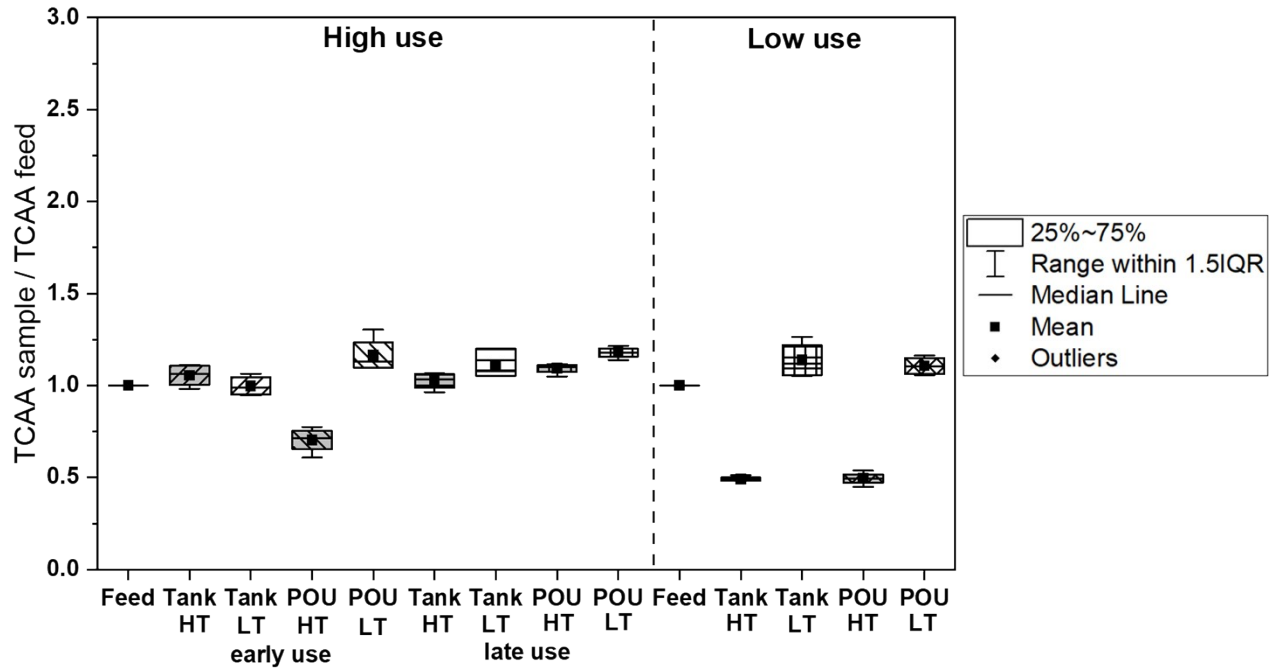

Figure S7. Average normalized TCAA concentrations for all sample locations under the different use patterns in Phase 2 in Boulder, CO (n = 55). Average feed concentration was  $10.7 \pm 1.1 \mu\text{g/L}$ . HT = high temperature of  $60^\circ\text{C}$ ; LT = low temperature of  $45^\circ\text{C}$

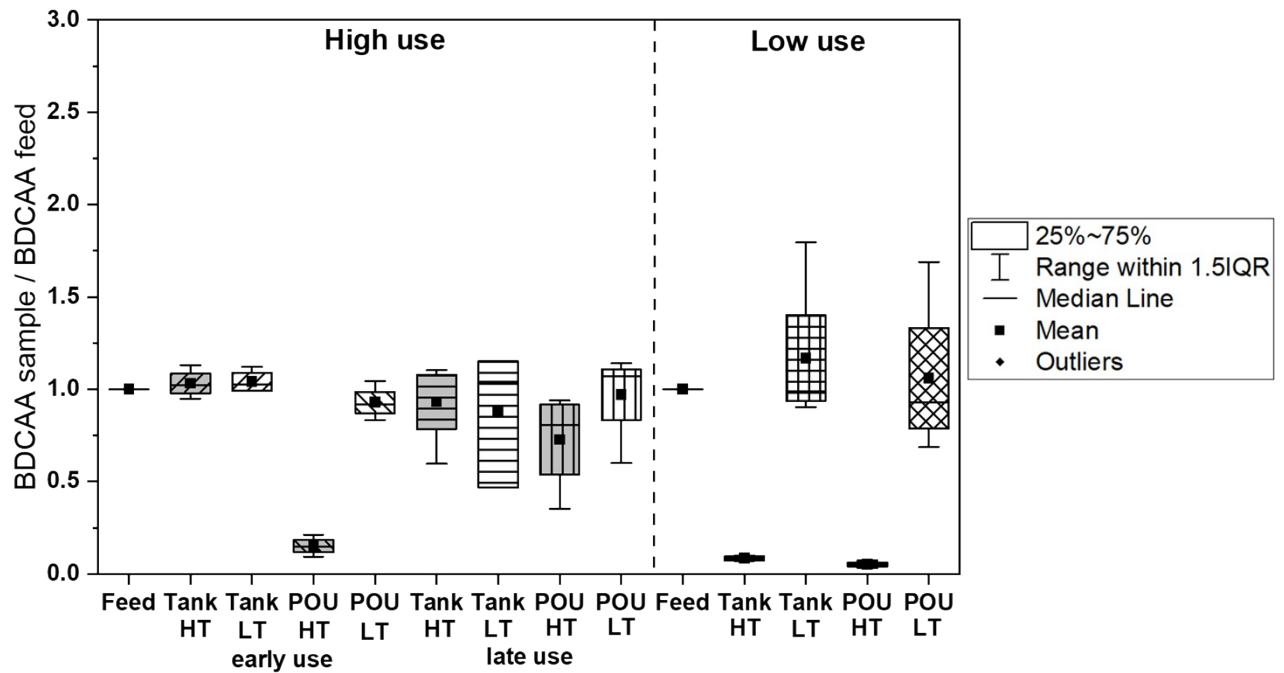

Figure S8. Average normalized BDCAA concentrations for all sample locations under the different use patterns in Phase 2 in free chlorine system Boulder, CO (n = 55). Average feed concentration was  $0.6 \pm 0.2 \mu\text{g/L}$ . HT = high temperature of  $60^\circ\text{C}$ ; LT = low temperature of  $45^\circ\text{C}$ .

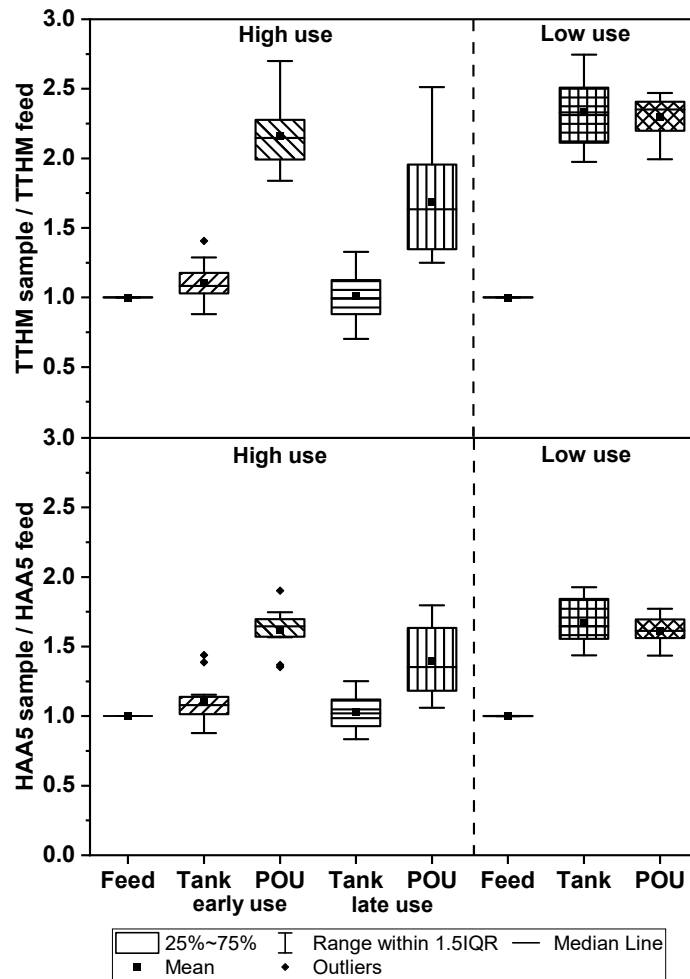

Figure S9. Average normalized TTHM and HAA5 for all sample locations under the different use patterns in Phase 1 (45°C) - free chlorine system (n = 83). Average feed TTHM concentration was  $26.1 \pm 7.4$   $\mu\text{g/L}$ . Average HAA5 feed concentration was  $22.9 \pm 9.0$   $\mu\text{g/L}$ .

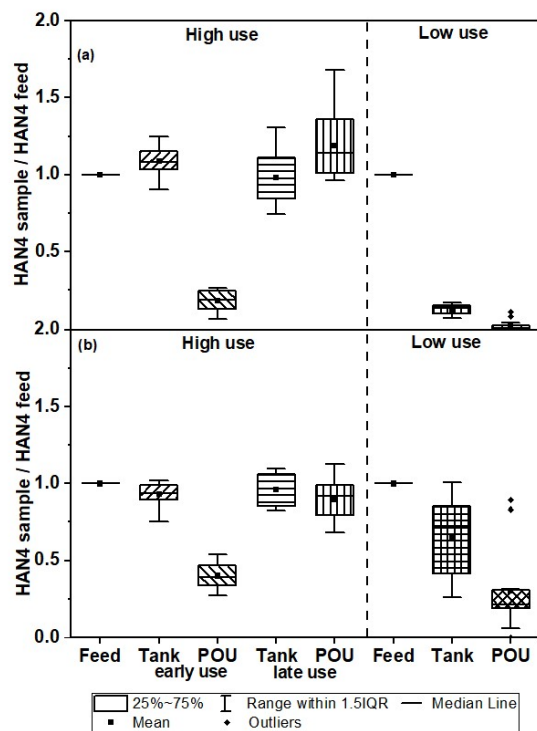

**Figure S10.** Average normalized HAN4 concentrations for all sample locations under the different use patterns in Phase 1 (45°C) in the (a) chlorine system (n = 83) and (b) chloramine system (n=82). Average HAN4 feed concentration in the chlorine system was  $1.49 \pm 0.24 \mu\text{g/L}$ . Average HAN4 feed concentration in the chloramine system was  $2.38 \pm 0.63 \mu\text{g/L}$ .



**TABLES**

Table S1. Sampling schedule and collection. Note: Tanks 3 and 4 = high use; Tanks 1 and 2 = low use.

| Time                | Activity                               | Sample collection                                                |                                                                           |
|---------------------|----------------------------------------|------------------------------------------------------------------|---------------------------------------------------------------------------|
|                     |                                        | Day prior to use                                                 | Day of use                                                                |
| 7:00 AM - 7:30 AM   | Feed flush tank = 30 min               | Feed sample taken during last 5 min of flush                     | Feed sample taken during last 5 min of flush                              |
| 7:30 AM - 8:10 AM   | Tank #3 (1 <sup>st</sup> use) = 40 min |                                                                  | POU high early sample taken at beginning of use (when stable temperature) |
| 8:10 AM - 8:15 AM   | Feed flush = 5 min                     |                                                                  |                                                                           |
| 8:15 AM - 8:55 AM   | Tank #4 (1 <sup>st</sup> use) = 40 min |                                                                  | POU high early sample taken at beginning of use (when stable temperature) |
| 8:55 AM - 9:00 AM   | Feed flush = 5 min                     |                                                                  |                                                                           |
| 9:00 AM - 9:20 AM   | Tank #1 = 20 min                       | Tank low use sample taken during last 5 min of use               | POU low use sample taken at beginning of use (when stable temperature)    |
| 9:20 AM - 9:25 AM   | Feed flush = 5 min                     |                                                                  |                                                                           |
| 9:25 AM - 9:45 AM   | Tank #2 = 20 min                       | Tank low use sample taken during last 5 min of use               | POU low use sample taken at beginning of use (when stable temperature)    |
| 11:10 AM - 11:50 AM | Tank #3 (2 <sup>nd</sup> use) = 40 min |                                                                  | Tank high late sample taken at 5 min before end of use                    |
| 11:55 AM - 12:35 PM | Tank #4 (2 <sup>nd</sup> use) = 40 min |                                                                  | Tank high late sample taken at 5 min before end of use                    |
| 2:50 PM - 3:30 PM   | Tank #3 (3 <sup>rd</sup> use) = 40 min | Tank high early sample taken during last 5 min before end of use | POU high late sample taken at beginning of use (when stable temperature)  |
| 3:35 PM - 4:15 PM   | Tank #4 (3 <sup>rd</sup> use) = 40 min | Tank high early sample taken during last 5 min before end of use | POU high late sample taken at beginning of use (when stable temperature)  |

Table S2. ANOVA for the free chlorine control study DBP formation between the experimental temperatures 48 °C and 60 °C for the reaction times of 3, 16, and 24 hours (n = 93).

|             | Temp (°C) | Time 1 (hr) | Time 2 (hr) | p < 0.005 |
|-------------|-----------|-------------|-------------|-----------|
| <b>TTHM</b> | 48        | 3           | 16          | no        |
|             |           | 16          | 24          | no        |
|             |           | 3           | 24          | no        |
|             | 60        | 3           | 16          | no        |
|             |           | 16          | 24          | no        |
|             |           | 3           | 24          | no        |
|             | 48 - 60   | 3           | 3           | no        |

|              | Temp (°C) | Time 1 (hr) | Time 2 (hr) | p < 0.005 |
|--------------|-----------|-------------|-------------|-----------|
|              | 48 - 60   | 16          | 16          | no        |
|              | 48 - 60   | 24          | 24          | no        |
| <b>HAA5</b>  | 48        | 3           | 16          | no        |
|              |           | 16          | 24          | no        |
|              |           | 3           | 24          | no        |
|              | 60        | 3           | 16          | no        |
|              |           | 16          | 24          | no        |
|              |           | 3           | 24          | yes       |
|              | 48 - 60   | 3           | 3           | no        |
|              | 48 - 60   | 16          | 16          | yes       |
|              | 48 - 60   | 24          | 24          | yes       |
| <b>HAA9</b>  | 48        | 3           | 16          | no        |
|              |           | 16          | 24          | no        |
|              |           | 3           | 24          | no        |
|              | 60        | 3           | 16          | no        |
|              |           | 16          | 24          | no        |
|              |           | 3           | 24          | yes       |
|              | 48 - 60   | 3           | 3           | no        |
|              | 48 - 60   | 16          | 16          | yes       |
|              | 48 - 60   | 24          | 24          | yes       |
| <b>DCAA</b>  | 48        | 3           | 16          | no        |
|              |           | 16          | 24          | no        |
|              |           | 3           | 24          | no        |
|              | 60        | 3           | 16          | no        |
|              |           | 16          | 24          | no        |
|              |           | 3           | 24          | no        |
|              | 48 - 60   | 3           | 3           | no        |
|              | 48 - 60   | 16          | 16          | no        |
|              | 48 - 60   | 24          | 24          | no        |
| <b>TCAA</b>  | 48        | 3           | 16          | no        |
|              |           | 16          | 24          | no        |
|              |           | 3           | 24          | no        |
|              | 60        | 3           | 16          | yes       |
|              |           | 16          | 24          | no        |
|              |           | 3           | 24          | yes       |
|              | 48 - 60   | 3           | 3           | no        |
|              | 48 - 60   | 16          | 16          | yes       |
|              | 48 - 60   | 24          | 24          | yes       |
| <b>DBCAA</b> |           |             |             |           |

|             | Temp (°C) | Time 1 (hr) | Time 2 (hr) | p < 0.005 |
|-------------|-----------|-------------|-------------|-----------|
|             | 48        | 3           | 16          | no        |
|             |           | 16          | 24          | no        |
|             |           | 3           | 24          | no        |
|             | 60        | 3           | 16          | yes       |
|             |           | 16          | 24          | no        |
|             |           | 3           | 24          | yes       |
|             | 48 - 60   | 3           | 3           | no        |
|             |           | 16          | 16          | yes       |
|             |           | 24          | 24          | yes       |
| <b>HAN4</b> | 48        | 3           | 16          | yes       |
|             |           | 16          | 24          | no        |
|             |           | 3           | 24          | yes       |
|             | 60        | 3           | 16          | yes       |
|             |           | 16          | 24          | no        |
|             |           | 3           | 24          | yes       |
|             | 48 - 60   | 3           | 3           | yes       |
|             |           | 16          | 16          | no        |
|             |           | 24          | 24          | no        |

Table S3. DBP yields – DBP/TOC (µg DBP/mg TOC) in free chlorine system

|                                                         | Sample                                                                                                | Avg TTHM/TOC | Std dev | Avg HAA5/TOC | Std dev | Avg HAA9/TOC | Std dev |
|---------------------------------------------------------|-------------------------------------------------------------------------------------------------------|--------------|---------|--------------|---------|--------------|---------|
| UFC (Summers et al. 1996)                               | 10 treated surface waters<br>24 hr, 20 °C                                                             | 29.4         | 7.2     | 18.9*        | 2.8     | -            | -       |
| Control Lab temp study - 22 °C (n = 18)                 | Feed                                                                                                  | 15.8         | -       | 13.2         | -       | 14.0         | -       |
|                                                         | 3-day and 4-day hold at 22 °C                                                                         | 36.3         | 3.5     | 22.7         | 0.1     | 23.9         | 0.1     |
| Control High temperature study - 48 °C and 60 °C (n=93) | Feed                                                                                                  | 14.7         | 1.4     | 12.1         | 0.8     | 13.6         | 1.0     |
|                                                         | High temperature samples (3 hr-, 16 hr- and 24 hr-hold at 48 °C and 60 °C)                            | 34.6         | 6.2     | 18.5         | 3.3     | 20.1         | 3.4     |
| Combined BLOQ control samples (n = 84)                  | High temp samples (3 hr-, 16 hr- and 24 hr-hold at 48 °C and 60 °C) and 3-day and 4-day hold at 22 °C | 34.8         | 6.1     | 18.8         | 3.4     | 20.4         | 3.4     |
| Tank study - Boulder Phase 1 – 45 °C (n=81)             | Feed                                                                                                  | 17.8         | 5.3     | 15.7         | 5.9     | 17.1         | 6.0     |
|                                                         | All POU samples and tank low use samples                                                              | 36.7         | 10.1    | 23.8         | 8.0     | 25.7         | 8.2     |
| Tank study -                                            | Feed                                                                                                  | 20.9         | 6.6     | 15.1         | 4.3     | 16.2         | 4.6     |

|                                                   |                                                                   |      |      |      |     |      |     |
|---------------------------------------------------|-------------------------------------------------------------------|------|------|------|-----|------|-----|
| Boulder Phase 2 –<br>45 °C and 60 °C<br>(n=55-70) | All POU samples and<br>tank low use samples<br>at 45 °C and 60 °C | 42.7 | 14.0 | 22.7 | 6.2 | 23.8 | 6.5 |
|---------------------------------------------------|-------------------------------------------------------------------|------|------|------|-----|------|-----|

Note:

Uniform formation conditions (UFC) tests: (hold time  $24 \pm 1$  h, pH  $8.0 \pm 0.2$ , 24 hour free chlorine residual  $1.0 \pm 0.4$  mg/L and temperature  $20 \pm 1$  °C<sup>41</sup>) \*Data was based on HAA6/TOC.

Table S4. Average water quality parameters in Phase 1 (45 °C) – free chlorine system Boulder, CO (n = 290).

| Use pattern | Sample | Free chlorine (mg/L) |                    | pH      |                    | TOC (mg/L) |                    |
|-------------|--------|----------------------|--------------------|---------|--------------------|------------|--------------------|
|             |        | Average              | Standard deviation | Average | Standard deviation | Average    | Standard deviation |
| High        | Feed   | 0.8                  | 0.1                | 7.9     | 0.1                | 1.7        | 0.6                |
|             | Tank   | 0.6                  | 0.1                | 7.9     | 0.1                | 1.7        | 0.5                |
| High early  | POU    | BLOQ                 | -                  | 8.0     | 0.1                | 1.7        | 0.6                |
|             | Tank   | 0.7                  | 0.1                | 7.9     | 0.1                | 1.6        | 0.5                |
| High late   | POU    | BLOQ                 | -                  | 7.9     | 0.1                | 1.6        | 0.5                |
|             | Feed   | 0.8                  | 0.1                | 7.9     | 0.1                | 1.7        | 0.6                |
| Low         | Tank   | BLOQ                 | -                  | 8.4     | 0.3                | 1.7        | 0.5                |
|             | POU    | BLOQ                 | -                  | 8.4     | 0.2                | 1.4        | 0.7                |

Table S5. Average water parameters in Phase 2 - free chlorine system Boulder, CO (n = 200).

| Use pattern | Temp (°C) | Sample | Free chlorine (mg/L) |                    | pH      |                    | TOC (mg/L) |                    |
|-------------|-----------|--------|----------------------|--------------------|---------|--------------------|------------|--------------------|
|             |           |        | Average              | Standard deviation | Average | Standard deviation | Average    | Standard deviation |
| High        |           | Feed   | 0.7                  | 0.1                | 7.9     | 0.1                | 1.5        | 0.3                |
|             | 60        | Tank   | 0.5                  | 0.04               | 7.9     | 0.1                | 1.5        | 0.3                |
| High early  | 45        | Tank   | 0.6                  | 0.1                | 7.9     | 0.1                | 1.5        | 0.3                |
|             | 60        | POU    | BLOQ                 | -                  | 8.1     | 0.2                | 1.4        | 0.3                |
| High late   | 45        | POU    | BLOQ                 | -                  | 8.0     | 0.2                | 1.4        | 0.3                |
|             | 60        | Tank   | 0.5                  | 0.04               | 8.0     | 0.3                | 1.5        | 0.4                |
|             | 45        | Tank   | 0.6                  | 0.04               | 8.0     | 0.1                | 1.5        | 0.4                |
|             | 60        | POU    | BLOQ                 | -                  | 8.0     | 0.2                | 1.5        | 0.4                |
|             | 45        | POU    | BLOQ                 | -                  | 7.9     | 0.1                | 1.5        | 0.4                |
|             |           | Feed   | 0.7                  | 0.03               | 7.9     | 0.2                | 1.5        | 0.3                |
| Low         | 60        | Tank   | BLOQ                 | -                  | 8.3     | 0.3                | 1.4        | 0.3                |
|             | 45        | Tank   | BLOQ                 | -                  | 8.2     | 0.1                | 1.5        | 0.3                |
|             | 60        | POU    | BLOQ                 | -                  | 8.3     | 0.2                | 1.4        | 0.3                |
|             | 45        | POU    | BLOQ                 | -                  | 8.1     | 0.2                | 1.4        | 0.3                |

Table S6. Average water quality parameters in Phase 1 (48 °C) - chloramination system Philadelphia, PA (n = 273).

| Use pattern | Sample | Total chlorine (mg/L) |                    | pH      |                    | TOC (mg/L) |                    |
|-------------|--------|-----------------------|--------------------|---------|--------------------|------------|--------------------|
|             |        | Average               | Standard deviation | Average | Standard deviation | Average    | Standard deviation |
| High        | Feed   | 1.6                   | 0.5                | 7.5     | 0.5                | 1.3        | 0.3                |
| High early  | Tank   | 1.3                   | 0.5                | 7.4     | 0.5                | 1.3        | 0.2                |
|             | POU    | 0.8                   | 0.3                | 7.6     | 0.4                | 1.4        | 0.2                |
| High late   | Tank   | 1.5                   | 0.4                | 7.5     | 0.4                | 1.3        | 0.2                |
|             | POU    | 1.1                   | 0.3                | 7.4     | 0.3                | 1.3        | 0.1                |
| Low         | Feed   | 1.7                   | 0.2                | 7.6     | 0.6                | 1.3        | 0.3                |
|             | Tank   | 1.4                   | 0.4                | 7.5     | 0.4                | 1.2        | 0.4                |
|             | POU    | 0.9                   | 0.5                | 7.6     | 0.4                | 1.3        | 0.2                |

Table S7. Average water quality parameters in Phase 2 - chloramination system Philadelphia, PA (n = 194).

| Use pattern | Temp  | Sample | Total chlorine (mg/L) |         | pH  |         | TOC (mg/L) |         |
|-------------|-------|--------|-----------------------|---------|-----|---------|------------|---------|
|             |       |        | Avg                   | Std dev | Avg | Std dev | Avg        | Std dev |
| High        |       | Feed   | 0.3                   | 0.3     | 6.7 | 0.4     | 1.4        | 0.2     |
| High early  | 60 °C | Tank   | 0.4                   | 0.4     | 6.8 | 0.3     | 1.6        | 0.2     |
|             | 45 °C | Tank   | 0.4                   | 0.4     | 7.0 | 0.2     | 1.5        | 0.2     |
|             | 60 °C | POU    | BLOQ                  | 0.2     | 7.0 | 0.2     | 1.5        | 0.2     |
|             | 45 °C | POU    | BLOQ                  | 0.2     | 6.9 | 0.3     | 1.4        | 0.2     |
| High late   | 60 °C | Tank   | 0.7                   | 0.6     | 7.0 | 0.4     | 1.4        | 0.2     |
|             | 45 °C | Tank   | 0.7                   | 0.7     | 7.0 | 0.3     | 1.5        | 0.2     |
|             | 60 °C | POU    | BLOQ                  | 0.2     | 7.1 | 0.3     | 1.4        | 0.1     |
|             | 45 °C | POU    | 0.3                   | 0.3     | 6.9 | 0.3     | 1.5        | 0.2     |
| Low         |       | Feed   | 0.3                   | 0.4     | 6.7 | 0.3     | 1.4        | 0.2     |
|             | 60 °C | Tank   | BLOQ                  | 0.1     | 6.8 | 0.2     | 1.4        | 0.1     |
|             | 45 °C | Tank   | 0.2                   | 0.3     | 7.1 | 0.3     | 1.5        | 0.1     |
|             | 60 °C | POU    | BLOQ                  | 0.0     | 7.1 | 0.3     | 1.4        | 0.1     |
|             | 45 °C | POU    | BLOQ                  | 0.1     | 7.2 | 0.4     | 1.4        | 0.2     |

Note: Avg – average; Std dev – standard deviation

Table S8. p-values obtained from paired t-tests to evaluate the impact of tank replication on water quality in the free chlorine system (Boulder, CO) and in the chloramination system (Philadelphia, PA) during experimental phase 1 (48 °C).

| <b>Boulder - Phase 1 p-values</b>      |                               |                                |           |            |                 |                  |                  |                  |
|----------------------------------------|-------------------------------|--------------------------------|-----------|------------|-----------------|------------------|------------------|------------------|
| <b>Samples</b>                         |                               | <b>Chlorine Residual</b>       | <b>pH</b> | <b>TOC</b> | <b>Norm THM</b> | <b>Norm HAA5</b> | <b>Norm HAA9</b> | <b>Norm HAN4</b> |
| Tank high early – replicate 1          | Tank high early – replicate 2 | $1.80 \times 10^{-5}$          | 0.584     | 0.164      | 0.763           | 0.185            | 0.267            | 0.585            |
| Tank low – replicate 1                 | Tank low – replicate 2        | 0.066                          | 0.600     | 0.797      | 0.226           | 0.046            | 0.057            | 0.152            |
| POU high early – replicate 1           | POU high early – replicate 2  | BLOQ                           | 0.054     | 0.959      | 0.223           | 0.495            | 0.508            | 0.209            |
| POU low – replicate 1                  | POU low – replicate 2         | BLOQ                           | 0.962     | 0.880      | 0.399           | 0.114            | 0.213            | 0.178            |
| Tank high late – replicate 1           | Tank high late – replicate 2  | 0.007                          | 0.338     | 0.689      | 0.939           | 0.571            | 0.603            | 0.676            |
| POU high late – replicate 1            | POU high late – replicate 2   | BLOQ                           | 0.419     | 0.651      | 0.272           | 0.934            | 0.781            | 0.484            |
| <b>Samples</b>                         |                               | <b>Chlorine Residual</b>       | <b>pH</b> | <b>TOC</b> | <b>THM</b>      | <b>HAA5</b>      | <b>HAA9</b>      | <b>HAN4</b>      |
| Day 0 feed                             | Day 1 feed                    | 0.830                          | 0.903     | 0.833      | 0.409           | 0.431            | 0.493            | 0.959            |
| <b>Philadelphia - Phase 1 p-values</b> |                               |                                |           |            |                 |                  |                  |                  |
| <b>Samples</b>                         |                               | <b>Total Chlorine Residual</b> | <b>pH</b> | <b>TOC</b> | <b>Norm THM</b> | <b>Norm HAA5</b> | <b>Norm HAA9</b> | <b>Norm HAN4</b> |
| Tank high early – replicate 1          | Tank high early – replicate 2 | 0.116                          | 0.353     | 0.337      | 0.085           | 0.160            | 0.141            | 0.056            |
| Tank low – replicate 1                 | Tank low – replicate 2        | 0.804                          | 0.809     | 0.223      | 0.899           | 0.175            | 0.095            | 0.791            |
| POU high early – replicate 1           | POU high early – replicate 2  | 0.917                          | 0.315     | 0.475      | 0.385           | 0.364            | 0.064            | 0.309            |
| POU low – replicate 1                  | POU low – replicate 2         | 0.247                          | 0.514     | 0.374      | 0.067           | 0.547            | 0.762            | 0.377            |
| Tank high late – replicate 1           | Tank high late – replicate 2  | 0.172                          | 0.603     | 0.491      | 0.841           | 0.882            | 0.323            | 0.867            |
| POU high late – replicate 1            | POU high late – replicate 2   | 0.502                          | 0.618     | 0.761      | 0.815           | 0.110            | 0.217            | 0.638            |
| <b>Samples</b>                         |                               | <b>Total Chlorine Residual</b> | <b>pH</b> | <b>TOC</b> | <b>THM</b>      | <b>HAA5</b>      | <b>HAA9</b>      | <b>HAN4</b>      |
| Day 0 feed                             | Day 1 feed                    | 0.367                          | 0.618     | 0.467      | 0.409           | 0.415            | 0.350            | 0.335            |

Note: Norm - normalized

Table S9. Normalized DBP concentrations, DBP concentration/ DBP concentration of feed (or initial for control), at the POU sample locations and at the point that the chlorine was below the DL in the control studies

| Sample point temperature | Time or location | TTHM |       | HAA5 |       | HAA9 |       | HAN4 |       |
|--------------------------|------------------|------|-------|------|-------|------|-------|------|-------|
|                          |                  | mean | stdev | mean | stdev | mean | stdev | mean | stdev |
| <b>control</b>           |                  |      |       |      |       |      |       |      |       |
| 22 °C *                  | 72 hr            | 2.16 | -     | 1.36 | -     | 1.25 | -     | 1.03 |       |
| 48 °C                    | 3 hr             | 2.22 | 0.16  | 1.48 | 0.04  | 1.45 | 0.04  | 1.28 | 0.12  |
| 60 °C                    | 3 hr             | 2.26 | 0.31  | 1.43 | 0.04  | 1.40 | 0.06  | 0.31 | 0.06  |
| <b>P1 - 45 °C</b>        |                  |      |       |      |       |      |       |      |       |
| High Early               | POU              | 2.16 | 0.23  | 1.62 | 0.15  | 1.59 | 0.17  | 0.18 | 0.07  |
| High Late                | POU              | 1.69 | 0.38  | 1.40 | 0.25  | 1.40 | 0.31  | 1.19 | 0.22  |
| Low                      | POU              | 2.30 | 0.16  | 1.61 | 0.11  | 1.58 | 0.13  | 0.02 | 0.04  |
| <b>P2 - 45 °C</b>        |                  |      |       |      |       |      |       |      |       |
| High Early               | POU              | 1.87 | 0.26  | 1.53 | 0.11  | 1.48 | 0.11  | 0.18 | 0.10  |
| High Late                | POU              | 1.84 | 0.09  | 1.47 | 0.09  | 1.44 | 0.09  | 1.31 | 0.12  |
| Low                      | POU              | 1.98 | 0.29  | 1.48 | 0.10  | 1.45 | 0.08  | 0.06 | 0.04  |
| <b>P2 - 60 °C</b>        |                  |      |       |      |       |      |       |      |       |
| High Early               | POU              | 1.75 | 0.30  | 1.31 | 0.10  | 1.27 | 0.09  | 0.01 | 0.01  |
| High Late                | POU              | 1.83 | 0.09  | 1.50 | 0.05  | 1.46 | 0.05  | 0.48 | 0.14  |
| Low                      | POU              | 1.86 | 0.38  | 1.19 | 0.10  | 1.15 | 0.08  | 0.01 | 0.01  |

\*n=1

Table S10. p-values obtained from **paired t-tests** to evaluate the impact of water use pattern on DBP concentrations during experimental Phase 1 (45 °C)- free chlorine system Boulder, CO.

| <b>Boulder - Phase 1 p-values</b> |                |                       |                       |                       |                        |
|-----------------------------------|----------------|-----------------------|-----------------------|-----------------------|------------------------|
| <b>Samples</b>                    |                | <b>THM</b>            | <b>HAA5</b>           | <b>HAA9</b>           | <b>HAN4</b>            |
| Tank high early                   | Tank low       | $1.11 \times 10^{-9}$ | $1.31 \times 10^{-7}$ | $8.51 \times 10^{-7}$ | $5.15 \times 10^{-12}$ |
| POU high early                    | POU low        | 0.038                 | 0.806                 | 0.714                 | $6.04 \times 10^{-5}$  |
| Tank high early                   | Tank high late | 0.256                 | 0.323                 | 0.404                 | 0.163                  |
| POU high early                    | POU high late  | 0.006                 | 0.026                 | 0.086                 | $5.85 \times 10^{-9}$  |

Table S11. p-values obtained from paired t-tests to evaluate the impact of water use pattern on water quality during Phase 2 - free chlorine system Boulder, CO.

| <b>Boulder - Phase 2 p-values</b> |                   |            |             |             |                       |
|-----------------------------------|-------------------|------------|-------------|-------------|-----------------------|
| <b>Samples</b>                    |                   | <b>THM</b> | <b>HAA5</b> | <b>HAA9</b> | <b>HAN4</b>           |
| Tank high early HT                | Tank low HT       | 0.006      | 0.245       | 0.324       | $5.10 \times 10^{-5}$ |
| Tank high early LT                | Tank low LT       | 0.003      | 0.004       | 0.004       | $2.09 \times 10^{-4}$ |
| POU high early HT                 | POU low HT        | 0.089      | 0.084       | 0.106       | 0.374                 |
| POU high early LT                 | POU low LT        | 0.016      | 0.219       | 0.412       | 0.016                 |
| Tank high early HT                | Tank high late HT | 0.212      | 0.325       | 0.235       | 0.455                 |
| Tank high early LT                | Tank high late LT | 0.465      | 0.214       | 0.261       | 0.531                 |
| POU high early HT                 | POU high late HT  | 0.605      | 0.016       | 0.022       | 0.002                 |
| POU high early LT                 | POU high late LT  | 0.846      | 0.078       | 0.041       | $1.34 \times 10^{-4}$ |

Note: HT = high temperature of 60 °C; LT = low temperature of 45 °C

Table S12. p-values obtained from **paired t-tests** to evaluate the impact of **temperature** on water quality during experimental Phase 2 in free chlorine system Boulder, CO.

| <b>Boulder - Phase 2 p-values</b> |                    |            |                       |             |                       |
|-----------------------------------|--------------------|------------|-----------------------|-------------|-----------------------|
| <b>Samples</b>                    |                    | <b>THM</b> | <b>HAA5</b>           | <b>HAA9</b> | <b>HAN4</b>           |
| Tank high early HT                | Tank high early LT | 0.088      | 0.035                 | 0.040       | 0.003                 |
| Tank low HT                       | Tank low LT        | 0.055      | 0.013                 | 0.014       | 0.018                 |
| POU high early HT                 | POU high early LT  | 0.044      | 0.012                 | 0.015       | 0.022                 |
| POU low HT                        | POU low LT         | 0.061      | $3.21 \times 10^{-4}$ | 0.001       | 0.057                 |
| Tank high late HT                 | Tank high late LT  | 0.164      | 0.797                 | 0.924       | 0.203                 |
| POU high late HT                  | POU high late LT   | 0.909      | 0.257                 | 0.333       | $4.62 \times 10^{-5}$ |

Note: HT = high temperature of 60 °C; LT = low temperature of 48 °C

Table S13. Average normalized DBP values (DBP samples/DBP feed) in Phase 1- Philadelphia, PA chloramination system (n = 328). Average feed concentration was TTHM =  $22.9 \pm 4.6 \mu\text{g/L}$ , HAA5 =  $21.8 \pm 6.7 \mu\text{g/L}$  and HAA9 =  $28.8 \pm 6.7 \mu\text{g/L}$ , HAN4 =  $2.4 \pm 0.6 \mu\text{g/L}$ .

| <b>Use pattern</b> | <b>Sample</b> | <b>Normalized TTHM</b> |                | <b>Normalized HAA5</b> |                | <b>Normalized HAA9</b> |                | <b>Normalized HAN4</b> |                |
|--------------------|---------------|------------------------|----------------|------------------------|----------------|------------------------|----------------|------------------------|----------------|
|                    |               | <b>Avg</b>             | <b>Std dev</b> |
|                    | Feed          | 1.00                   | -              | 1                      | -              | 1                      | -              | 1                      | -              |
| <b>High early</b>  | Tank          | 0.96                   | 0.07           | 1.00                   | 0.04           | 0.99                   | 0.03           | 0.93                   | 0.08           |
|                    | POU           | 1.14                   | 0.10           | 1.12                   | 0.07           | 1.07                   | 0.07           | 0.40                   | 0.08           |
| <b>High late</b>   | Tank          | 0.99                   | 0.06           | 1.02                   | 0.02           | 1.01                   | 0.03           | 0.96                   | 0.10           |
|                    | POU           | 1.12                   | 0.11           | 1.07                   | 0.03           | 1.05                   | 0.04           | 0.90                   | 0.13           |
| <b>Low</b>         | Tank          | 1.05                   | 0.09           | 1.06                   | 0.09           | 1.04                   | 0.08           | 0.65                   | 0.26           |
|                    | POU           | 1.12                   | 0.11           | 1.12                   | 0.07           | 1.07                   | 0.07           | 0.33                   | 0.27           |



Table S14. p-values obtained from paired t-tests to evaluate the impact of water use pattern on water quality in Philadelphia, PA - chloramination system during Phase 1 (48 °C).

| Philadelphia - Phase 1 p-values |                |       |       |       |                       |  |
|---------------------------------|----------------|-------|-------|-------|-----------------------|--|
| Samples                         |                | THM   | HAA5  | HAA9  | HAN4                  |  |
| Tank high early                 | Tank low       | 0.010 | 0.096 | 0.138 | $1.11 \times 10^{-3}$ |  |
| POU high early                  | POU low        | 0.947 | 0.563 | 0.556 | 0.616                 |  |
| Tank high early                 | Tank high late | 0.180 | 0.157 | 0.127 | 0.495                 |  |
| POU high early                  | POU high late  | 0.697 | 0.040 | 0.524 | $1.48 \times 10^{-6}$ |  |

Table S15. Average normalized TTHM, HAA5, HAA9 and HAN4 for all sample locations under the different use patterns during Phase 2 - chloramination system Philadelphia, PA. Average feed concentration were TTHM =  $46.7 \pm 10.4$  µg/L, HAA5 =  $20.6 \pm 6.6$  µg/L, HAA9 =  $27.6 \pm 8.5$  µg/L, and HAN4 =  $3.3 \pm 0.8$  µg/L.

| Use pattern | Use time | Sample point | TTHM (µg/L)   |         |                |         | HAA5 (µg/L)   |         |                |         | HAN4 (µg/L)   |         |                |         |
|-------------|----------|--------------|---------------|---------|----------------|---------|---------------|---------|----------------|---------|---------------|---------|----------------|---------|
|             |          |              | Low temp 45°C |         | High temp 60°C |         | Low temp 45°C |         | High temp 60°C |         | Low temp 45°C |         | High temp 60°C |         |
|             |          |              | Avg           | Std dev | Avg            | Std dev | Avg           | Std dev | Avg            | Std dev | Avg           | Std dev | Avg            | Std dev |
|             |          | Feed         | 1             | -       | 1              | -       | 1             | -       | 1              | -       | 1             | -       | 1              | -       |
| <b>High</b> | early    | Tank         | 0.95          | 0.13    | 0.96           | 0.14    | 1.11          | 0.21    | 1.15           | 0.11    | 1.15          | 0.30    | 1.17           | 0.31    |
|             |          | POU          | 1.06          | 0.14    | 1.15           | 0.09    | 1.22          | 0.09    | 1.17           | 0.16    | 0.64          | 0.31    | 0.31           | 0.20    |
|             | late     | Tank         | 0.95          | 0.09    | 0.92           | 0.18    | 1.10          | 0.11    | 1.01           | 0.05    | 0.85          | 0.24    | 0.84           | 0.29    |
|             |          | POU          | 1.02          | 0.06    | 1.02           | 0.17    | 1.07          | 0.08    | 1.02           | 0.08    | 0.80          | 0.12    | 0.33           | 0.13    |
| <b>Low</b>  |          | Tank         | 1.01          | 0.05    | 1.00           | 0.10    | 0.89          | 0.14    | 0.99           | 0.12    | 0.46          | 0.32    | 0.34           | 0.09    |
|             |          | POU          | 1.13          | 0.09    | 1.13           | 0.11    | 1.06          | 0.02    | 1.03           | 0.09    | 0.22          | 0.16    | 0.08           | 0.07    |

| Use pattern | Use time | Sample point | HAA9 (µg/L)   |         |                |         |
|-------------|----------|--------------|---------------|---------|----------------|---------|
|             |          |              | Low temp 45°C |         | High temp 60°C |         |
|             |          |              | Avg           | Std dev | Avg            | Std dev |
|             |          | Feed         | 1             | -       | 1              | -       |
| <b>High</b> | early    | Tank         | 1.06          | 0.16    | 1.10           | 0.03    |
|             |          | POU          | 1.13          | 0.02    | 1.03           | 0.08    |
|             | late     | Tank         | 1.08          | 0.15    | 0.99           | 0.08    |
|             |          | POU          | 1.04          | 0.08    | 0.95           | 0.06    |
| <b>Low</b>  |          | Tank         | 0.84          | 0.12    | 0.92           | 0.07    |
|             |          | POU          | 0.97          | 0.03    | 1.01           | 0.24    |
